# Supplementary material
Source: Springer Nature journal article supplement (https://www.springermedizin.de/resource/supplementary/12889_2010_2535_MOESM6_ESM.pdf/9486336)
Supplement: MOESM6 [file 9486336]

Tanzania estimated annual home births N= 800,000  
- Very low birth weight (prevalence 1.5%): N= 12,000  
- Low birth weight (prevalence 14.5%): N= 120,000

Short foot length  
(<7cm)

- Babies referred with estimated birth weight <1500g (prevalence of short feet 2.6%): 20,820
- Babies with birth weight <1500g correctly identified (sensitivity=75%): 9,000
- Babies with birth weight <1500g missed (NPV=99%): 3,000

Medium foot length  
(<8cm)

- Babies targeted with extra care with estimated b weight <2500 (prevalence 52%): 415,560
- Babies with birth weight <2500g correctly identified (sensitivity=87%): 100,920
- Babies with birth weight <2500g missed (NPV=96%): 14,964
- Babies with birth weight <1500g missed (NPV=100%): 0
